# Supplementary material for: Detecting organisational innovations leading to improved ICU outcomes: a protocol for a double-blinded national positive deviance study of critical care delivery
Source: PubMed Central journal article supplement — BMJ Open. 2017 Jun 14;7(6):e015930. doi: 10.1136/bmjopen-2017-015930 (PMC5541524; doi:10.1136/bmjopen-2017-015930), 2017-06-14
Supplement: bmjopen-2017-015930.draft_revisions.pdf [file bmjopen-2017-015930.draft_revisions.pdf]

# BMJ Open

## Detecting organizational innovations leading to improved ICU outcomes: a protocol for a double-blinded national positive deviance study of critical care delivery

|                                 |                                                                                                                                                                                                                                                                                                                                                                                                                                                                                                                                                                                                                                                                                                                                  |
|---------------------------------|----------------------------------------------------------------------------------------------------------------------------------------------------------------------------------------------------------------------------------------------------------------------------------------------------------------------------------------------------------------------------------------------------------------------------------------------------------------------------------------------------------------------------------------------------------------------------------------------------------------------------------------------------------------------------------------------------------------------------------|
| Journal:                        | <i>BMJ Open</i>                                                                                                                                                                                                                                                                                                                                                                                                                                                                                                                                                                                                                                                                                                                  |
| Manuscript ID                   | bmjopen-2017-015930                                                                                                                                                                                                                                                                                                                                                                                                                                                                                                                                                                                                                                                                                                              |
| Article Type:                   | Protocol                                                                                                                                                                                                                                                                                                                                                                                                                                                                                                                                                                                                                                                                                                                         |
| Date Submitted by the Author:   | 12-Jan-2017                                                                                                                                                                                                                                                                                                                                                                                                                                                                                                                                                                                                                                                                                                                      |
| Complete List of Authors:       | Chiou, Howard; Stanford University, Clinical Excellence Research Center; Emory University School of Medicine, Medical Scientist Training Program and Department of Anthropology<br>Jopling, Jeffrey; Stanford University, Clinical Excellence Research Center; Gordon and Betty Moore Foundation<br>Scott, Jennifer; Stanford University, Clinical Excellence Research Center<br>Ramsey, Meghan; Stanford University, Clinical Excellence Research Center<br>Vranas, Kelly; Stanford University, Clinical Excellence Research Center; Oregon Health & Science University<br>Wagner, Todd; Stanford University, Clinical Excellence Research Center<br>Milstein, Arnold; Stanford University, Clinical Excellence Research Center |
| <b>Primary Subject Heading</b>: | Health services research                                                                                                                                                                                                                                                                                                                                                                                                                                                                                                                                                                                                                                                                                                         |
| Secondary Subject Heading:      | Intensive care, Qualitative research, Medical management                                                                                                                                                                                                                                                                                                                                                                                                                                                                                                                                                                                                                                                                         |
| Keywords:                       | Organisation of health services < HEALTH SERVICES ADMINISTRATION & MANAGEMENT, Quality in health care < HEALTH SERVICES ADMINISTRATION & MANAGEMENT, INTENSIVE & CRITICAL CARE, QUALITATIVE RESEARCH                                                                                                                                                                                                                                                                                                                                                                                                                                                                                                                             |
|                                 |                                                                                                                                                                                                                                                                                                                                                                                                                                                                                                                                                                                                                                                                                                                                  |

SCHOLARONE™  
Manuscripts

**Title (50 words)**

Detecting organizational innovations leading to improved ICU outcomes: a protocol for a double-blinded national positive deviance study of critical care delivery.

**Authors**

Howard Chiou\*<sup>1,3</sup>, Jeffrey K. Jopling\*<sup>1,2</sup>, Jennifer Yang Scott<sup>1</sup>, Meghan Ramsey<sup>1</sup>, Kelly Vranas<sup>1,4</sup>, Todd H. Wagner<sup>1</sup>, Arnold Milstein<sup>1</sup>

\* Co-authors

1 Clinical Excellence Research Center, Stanford University, Stanford, CA, United States.

2 Gordon and Betty Moore Foundation, Palo Alto, CA, United States.

3 Emory University School of Medicine Medical Scientist Training Program and Department of Anthropology, Emory University, Atlanta, GA, United States.

4 Oregon Health & Science University, Portland, OR, United States.

*Correspondence to:* Howard Chiou; [howard.chiou@stanford.edu](mailto:howard.chiou@stanford.edu)

**Abstract (300 words)**

*Introduction:* There is substantial variability in intensive care unit (ICU) utilization and quality of care. However, the factors that drive this variation are poorly understood. This study utilizes a novel adaptation of positive deviance approach— a methodology used in public health that assumes solutions to challenges already exist within the system to detect innovations that are likely to improve intensive care.

*Methods and Analysis:* We used the Philips eICU Research Institute database (eRI), containing 3.3 million patient records from over 50 health systems across the United States. Acute Physiology and Chronic Health Evaluation (APACHE) IVa scores were used to identify the study cohort, which included ICU patients whose outcomes were felt to be most sensitive to organizational innovations. The primary outcomes included mortality and length of stay. Outcome measurements were directly standardized, and bootstrapped confidence intervals calculated with adjustment for false discovery rate. Using purposive sampling, we then generated a blinded list of 5 positive outliers and 5 negative comparators.

Using rapid qualitative inquiry, blinded interdisciplinary site visit teams will conduct interviews and observations using a team ethnography approach. After data collection is completed, the data will be unblinded and analyzed using a cross-case method to

1  
2  
3 identify themes, patterns, and innovations using a constant comparative grounded  
4 theory approach. This process not only allows for the detection of innovations in  
5 intensive care, but also support an evaluation of how positive deviance and rapid  
6 qualitative inquiry methods can be adapted to healthcare.  
7

8  
9 *Ethics and Dissemination:* The study protocol was approved by the Stanford University  
10 Institutional Review Board (Reference: 39509). We plan on publishing study findings  
11 and methodological guidance in peer-reviewed academic journals, white papers, and  
12 presentations at conferences.  
13

## 14 15 16 **Strengths and Limitations**

- 17  
18 • This study is a methodologically innovative translation of the positive deviance  
19 approach to health services research, and incorporates both qualitative and  
20 quantitative rigor.  
21
- 22 • A national database of ICU care in the United States is used, and the  
23 methodology is a mixed-methods approach that triangulates between qualitative  
24 and quantitative data sources.  
25
- 26 • The project is likely to inform the organization of care delivery in ICUs, as well as  
27 both positive deviance and rapid qualitative methodologies in healthcare.  
28
- 29 • The database is limited to ICUs with telemedicine capabilities, and case-mix  
30 adjustment using APACHE IVa is imperfect. Study participants and site visitors  
31 may also not be able to accurately ascertain which innovations drive  
32 performance.  
33

## 34 35 36 **Introduction**

37  
38  
39 Critical illness represents an enormous burden in the United States, with more than 5  
40 million patients admitted annually to ICUs. Caring for these patients consumes a  
41 disproportionate amount of resources: despite comprising less than 10% of all of the  
42 hospital beds, ICU care accounts for 13.4% of total hospital costs, and 0.66% of the  
43 national gross domestic product.[1] This burden will likely increase as populations age,  
44 as both utilization and the proportion of beds allocated to intensive care rise.[1–4]  
45

46  
47 Yet, the quality of care delivered varies dramatically between units and hospitals. ICUs  
48 differ widely in their rates of compliance with best practices and rates of avoidable  
49 complications (e.g., hospital acquired infections).[5] Risk-adjusted mortality also differs  
50 between ICUs, and the best ICUs in the country have 10-12 fewer deaths for every 100  
51 patients than the lowest performing ICUs, even after controlling for factors like  
52 discharge practices and patient demographics.[6] These trends have been confirmed in  
53 more recent studies of ventilated patients.[7,8]  
54  
55  
56  
57  
58  
59  
60

1  
2  
3 Rather than being driven by access to different technologies, these variations in  
4 performance are likely driven by differences in organization and practices.[9,10]  
5 Modern ICUs are more an *organizational innovation* than a technological one, matching  
6 a concentration of personnel and resources for any type of critically ill patient. Previous  
7 research has identified organizational factors like RN-to-patient ratios, daily care plans,  
8 and usage of care bundles as associated with improved risk-adjusted mortality.[11–13]  
9  
10

11 Unfortunately, innovations in organization and practice are not well described in the  
12 critical care literature. Hospitals do not typically share their innovative practices with one  
13 another, and data to compare ICU performance are not readily available. Although  
14 some practices may be published, context is frequently not reported in sufficient detail  
15 to ensure successful implementation.[14] All of these factors obscure our ability to  
16 identify which aspects of critical care organization and practices help drive performance.  
17  
18

19 Positive deviance is one methodology that may offer hope. This approach assumes that  
20 innovations that address problems common to many organizations have already been  
21 developed, and can be detected by studying positive outliers before being tested and  
22 disseminated.[15,16] Originating from global health, the approach has been used  
23 successfully in a wide variety of settings to improve healthcare quality, including  
24 diabetes management in primary care practices, and hospital door-to-balloon times in  
25 response to acute myocardial infarction.[17]  
26  
27

28 However, a systematic review of positive deviance studies in healthcare found research  
29 quality to be low, and there have been very few applications of the approach in the  
30 critical care setting.[15] Highlighting the need for increased rigor, a previous study  
31 utilizing qualitative site visits failed to identify differences between ICUs associated with  
32 performance.[10] The goal of this research protocol is to describe our methods for  
33 conducting a positive deviance study in critical care.  
34  
35  
36  
37  
38

### 39 **Methods and Analysis**

40 Conducting a positive deviance study requires four steps: 1) identify outliers within an  
41 area of interest, 2) utilize qualitative approaches to generate hypotheses to explain their  
42 performance, 3) test hypotheses in a larger sample, and 4) disseminate evidence about  
43 best practices.[18,19] Our strategy utilizes a blinded, retrospective approach in two first  
44 steps. We will first analyze a national database of ICUs to develop a study cohort of five  
45 positive outliers and five comparator ICUs. This quantitative phase will be followed by  
46 in-depth qualitative work at these ten sites, where we will build comparative case  
47 studies on their innovations and themes.  
48  
49  
50  
51  
52  
53  
54  
55  
56  
57  
58  
59  
60

## Quantitative Phase: Identifying Outliers

### *Data Source*

This study will utilize data from the Philips eICU Research Institute database (eRI), containing over 3.3 million patient records from over 50 health systems from 2003 through 2015. All ICUs in the database have implemented the Philips eICU telemedicine system. Data for ICU admissions includes vital sign measurements, quality metrics, medication orders, and patient laboratory values. All of the ICUs in the study were offered an opportunity to opt-out of the study, and the protected health information of individual patients was not included. The database includes over 400 hospitals; as of 2014, there were 5,686 acute care hospitals in the United States, all of which had at least one ICU.[20]

### *ICU Cohort Selection*

Inclusion criteria included all hospital units that contributed data to the Philips eRI database between 2013 and 2015. We then excluded hospital units who did not participate for all three years, as well as self-identified stepdown or intermediate care units. To minimize variation from small sample sizes, we also excluded low-volume ICUs, defined as ICUs with fewer than 300 discharges per year. The final cohort included 276 ICUs that cared for a total of 370,278 patients over three years. These ICUs form a geographically diverse sample of ICUs with eICU capabilities.

### *Outcome Measurements*

Primary outcomes included mortality and length of stay for patients admitted to the ICU, since these parameters reflect both ICU quality and utilization. While mortality rates are generally low in critical care and thus too insensitive to use in comparisons,[21–23] rates of deaths are sufficiently high enough among ICU patients to be used as a quality indicator.[6] As patients may be transferred elsewhere in the hospital as death nears,[24] ICU patient mortality rates were calculated using deaths that occurred both in the ICU (in-ICU mortality), and including deaths after transfer elsewhere within the hospital (combined post-transfer mortality).

The eRI database does not include any cost estimates. We used length of stay used as a proxy for resource utilization, since up to 85% of ICU costs are explained by length of stay alone.[25] In this study, we calculated a mean residual for each ICU, utilizing the difference between observed and expected lengths of stay (OMELOS) as predicted by the APACHE IVa algorithm. Patients who died before discharge were excluded. As with mortality, we calculated length of stay including only ICU lengths of stay (in-ICU length of stay), and including days after transfer elsewhere within the hospital (combined post-transfer length of stay).

### *Patient Cohort Selection*

The variation in outcomes between ICUs are mostly dominated by those who are very healthy or very sick. For example, ICU metrics are greatly skewed by low-risk patients

1  
2  
3 admitted to the ICU purely for monitoring purposes, and by high-risk patients for whom  
4 death may be a likely outcome. Consequently, this study included only patients who  
5 have a predicted risk of death between 2% and 20%, as predicted by the APACHE IVa  
6 algorithms. Patients without calculated APACHE IVa scores were excluded. These  
7 limits were based on expert consensus among clinicians familiar with the APACHE IVa  
8 scoring system.  
9

10  
11 Patients transferred between hospitals were also excluded from the study. Transfer  
12 status from another institution is an independent risk factor for mortality, even after  
13 controlling for case-mix.[26] Small numbers of transfer patients dramatically affect  
14 mortality rates,[27–29] and transfers are excluded from the APACHE IVa models.[30] In  
15 order to control for this “transfer bias”, we excluded all patients who were transferred  
16 from another institution. We also excluded patients with extreme outlier unit lengths of  
17 stay above 300 days.  
18  
19

### 20 *Direct Risk Standardization*

21  
22 In order to enable direct comparison of outcomes between each ICU, direct risk  
23 standardization was used to adjust for variations in case-mix.[31] In summary, we  
24 calculated a weighted average for each outcome variable using 2 percentage point  
25 increment risk groups based on APACHE IVa-predicted ICU mortality (e.g., 2-4%, ...,  
26 and 18-20%). The weights were equal to the proportion of the number of patient records  
27 within each risk group. Weighted average mortality rates and lengths of stay were  
28 calculated for all patient records for each individual ICU. ICUs with less than 300 patient  
29 records for those within the 2-20% APACHE IVa-predicted mortality were excluded to  
30 eliminate extreme variations due to small sample sizes.  
31  
32  
33

### 34 *Bootstrapped Variance and Percentile Confidence Intervals*

35  
36 As risk adjustment was performed utilizing direct risk standardization, all adjusted  
37 outcome variables were weighted means. Unlike the arithmetic mean, no analytical  
38 analog of the standard error exists for weighted means.[32] Therefore, we estimated  
39 confidence intervals through bootstrapping.[33,34] All outcome variables were  
40 calculated for each ICU, utilizing 5000 resamples with replacement equal to the total  
41 number of patient records for each individual ICU. Variance and percentile confidence  
42 intervals were then calculated for each ICU.  
43  
44  
45

### 46 *Outlier Identification and False Discovery Rate Control*

47  
48 Outlier and comparator ICUs were defined as ICUs with confidence intervals that do not  
49 overlap with the population mean ( $\alpha < 0.05$ ). P-values were generated for each ICU  
50 using a two-sided student's t test, and then adjusted for false discovery rate ( $d < .05$ )  
51 using the using the Benjamin-Hochberg procedure.[35] This process was repeated for  
52 each of the four outcome variables (i.e., in-ICU mortality, combined post-transfer  
53 mortality, in-ICU length of stay, and combined post-transfer length of stay), and  
54 visualized using caterpillar plots sorted by confidence interval limits. ICUs identified as  
55  
56  
57  
58  
59  
60

1  
2  
3 outliers on all four outcome variables were placed into positive outlier and negative  
4 comparator groups, respectively.  
5  
6  
7  
8  
9

## 10 11 **Qualitative Phase: Detecting Innovations**

### 12 13 *Site Selection*

14  
15 Two members of our study team (HC and MR) were provided with an unblinded list of  
16 ICUs identified as positive outliers and negative comparators. A purposive sample of 5  
17 positive outliers and 5 negative comparators were selected, utilizing a maximum  
18 variation approach based on the following institutional characteristics: 1) ICU type, 2)  
19 patient volume, 3) academic affiliation, 4) presence of intermediate care units, 5) case-  
20 mix of ICU, 6) geographic locale, 7) urban or rural, and 8) health system.[17] The site  
21 visit teams were then provided with a blinded list of these ICUs for recruitment. The  
22 sample size of 10 sites is based on previous research establishing ten sites as likely to  
23 achieve thematic saturation for positive deviance studies in healthcare.[19]  
24  
25  
26

### 27 28 *Site Visits*

29 We adapted the team-based Rapid Qualitative Inquiry (RQI) methodologies used in  
30 public health and applied anthropology, which rests on building rapport quickly,  
31 triangulating across multiple sources of data, and a multidisciplinary research team.[36]  
32 The blinded RQI team includes a surgeon and systems engineer (JJ), a registered ICU  
33 nurse and administrative fellow (DB), a healthcare researcher (RP)— all trained by two  
34 applied anthropologists (HC and HK). The research team will collect and analyze three  
35 key data sources: 1) semi-structured interviews, 2) unstructured observations, and 3)  
36 extant data.  
37  
38  
39

40 The Consolidated Framework for Implementation Research (CFIR) will be used as a  
41 theoretical framework to guide both data collection and subsequent analysis.[37] CFIR  
42 is a determinant framework consisting of constructs known to be associated with  
43 effective implementation, and intended to guide evaluations and implementation  
44 strategy.[37,38] As the CFIR constructs include interventions, individuals, organizational  
45 context, and organizational processes, this framework provides both a typology and  
46 terminology to evaluate interventions and their context.  
47  
48

### 49 50 *Semi-structured Team Interviews and Focus Groups*

51 Bedside staff and unit managers will be recruited for interviews utilizing a combination of  
52 key informant, snowball, and opportunistic sampling.[39] Recruitment will occur using a  
53 maximum variation approach, aiming to capture a wide variety of perspectives at each  
54 site from across the hierarchy, including doctors, nurses, nursing technicians, and unit  
55 managers. Teams will recruit at least six to eight participants at each site, a sample size  
56  
57  
58  
59  
60

1  
2  
3 found previously to be usually sufficient for thematic saturation in healthcare positive  
4 deviance.[19,40]  
5

6 All interviews will be semi-structured, and utilize an interview guide that broadly  
7 addresses three key domains: unit-practices and communication, quality improvement,  
8 and relationships between management and frontline staff. The interviews will seek to  
9 identify innovations in these key domains and generate testable hypotheses that may  
10 explain variations in performance.[41] All interviews will be conducted in private settings,  
11 digitally recorded, and transcribed verbatim by professional transcriptionists.  
12  
13

### 14 *Unstructured Observations*

15  
16  
17 Observational data are particularly important for rapid qualitative approaches, as they  
18 provide a point of triangulation against data from interviews.[42] Our strategy requires  
19 observational data obtained using ethnographic methodologies, which are designed to  
20 access the typical routines and conditions of a field site.[43] Site visit teams will conduct  
21 at least two hours of direct observation in each ICU, including physician rounds, nursing  
22 shift changes, cardiopulmonary resuscitations, and fixed observation at nursing stations  
23 and eICU command centers. Each researcher will systematically generate descriptive  
24 field notes, including observed behaviors, processes, and environmental features.[39]  
25 These unstructured observations also provide opportunities to build rapport and conduct  
26 informal interviews with bedside staff.  
27  
28  
29

### 30 *Rapid Continuous Constant Comparative Analysis*

31  
32  
33 This project will adapt a team-based, continuous analysis methodology commonly used  
34 in rapid qualitative approaches.[36] Considered critical to a team ethnographic approach,  
35 site visit teams will debrief as often as possible, reviewing field notes and interviews to  
36 generate potential hypotheses and innovations for each field site. The main purpose is  
37 to generate analytical field notes in a modified grounded theory approach, generating  
38 themes and causal explanations grounded in the data.[44,45]  
39  
40

41 All field notes, preliminary reports, and interview transcripts are then imported to  
42 Dedoose, a qualitative analysis software designed for teams.[46] All data will then be  
43 inductively coded using a combination of grounded theory and constant comparative  
44 methods, extending the formal codebook of themes identified during team debriefs. As  
45 site visit teams remain blinded to each site's outlier status, a constant comparative  
46 method will be used to generate causal models of factors and innovations, assessing  
47 the possibility that a field site is a positive outlier or negative comparator site in turn.  
48 Additional field notes are generated in this process ("memoing"), and a preliminary  
49 report for each site visit is generated.[36]  
50  
51

### 52 *Cross-Case Analysis*

53  
54  
55 All members of the study team will then be unblinded as to each sites' outlier status,  
56 and all data sources will be analyzed using a cross-case method.[47] Relevant  
57  
58  
59



1  
2  
3 qualitative and quantitative data points will be entered into a matrix, organized by  
4 themes of interest identified during site visits, as well as the outlier status of each site.  
5 The data will then be interrogated for patterns, themes, similarities, and differences  
6 between the outlier and comparison sites. Causal models developed during the  
7 generation of preliminary reports will then be extended across multiple sites.  
8  
9

## 10 **Ethics and Dissemination**

11  
12  
13 The study protocol was reviewed and approved by the Stanford University Institutional  
14 Review Board (reference: 39509). Verbal informed consent will be obtained for all  
15 participants, and interviews will remain confidential and de-identified. Any study findings  
16 will only be reported in the aggregate, and individual ICUs will never be identified in  
17 publications. Participating ICUs will not be disclosed their outlier status, but all  
18 publications and reports will be shared with recruited sites. Potential innovations will  
19 also be disseminated to participants, as well as nationally through the work at the  
20 Stanford Clinical Excellence Research Center. We plan on publishing study findings and  
21 methodological guidance in peer-reviewed academic journals, white papers, and  
22 presentations at academic medical conferences.  
23  
24  
25  
26

## 27 **Study Status**

28  
29 The quantitative portion of this study is complete. Qualitative data collection began in  
30 September 2016, and expected to complete by April 2017. Qualitative data analysis will  
31 be completed by June 2017.  
32  
33  
34  
35

## 36 **Discussion and Limitations**

37  
38 We aim to extend positive deviance methods into a national study of intensive care. By  
39 focusing only on a subset of patients most likely to have lengths of stay and mortality  
40 rates affected by organizational processes and practices, this study aims to detect new  
41 innovations in the delivery of critical care. These innovations can then be tested in  
42 subsequent studies, and disseminated broadly if found to be efficacious.  
43  
44

45 There are several limitations to this study. First, the database includes only intensive  
46 care units that subscribed to the Philips eICU program. However, as the main objective  
47 of this study is to identify new organizational innovations that may drive ICU  
48 performance, the fact that all ICUs in this study have telemedicine capabilities ensures a  
49 similar level of technological access. In the United States, there are few other national  
50 databases of ICU quality, and the database is likely one of the most comprehensive  
51 data sources available.  
52  
53

54 Second, APACHE IVa is an imperfect measure of disease severity, although it remains  
55 one of the most widely used and best validated measures.[48,49] As the main purpose  
56  
57  
58  
59

1  
2  
3 of the quantitative portion of this project is to identify outlier ICUs likely to harbor  
4 organizational innovations, we believe the large sample sizes in this project will also  
5 protect against this limitation.  
6

7 Finally, an intrinsic risk of the positive deviance approach is that success is dependent  
8 on the ability of either the researchers or the study participants to identify the  
9 innovations leading to variations in outcome. Although the double-blinded nature of this  
10 study maximizes our ability to correctly identify successful innovations, there is an  
11 unavoidable risk that no new innovations will be identified. Replication of positive  
12 deviance studies can also be challenging, as differing site visit teams may identify  
13 different innovations as worthwhile.  
14  
15

16 This protocol, however, also contains several novel features to further the translation of  
17 positive deviance methods to healthcare services research. First, we are conducting the  
18 study with both qualitative and quantitative rigor, responding to previous criticisms of the  
19 method. Second, this study is also one of the first to utilize a double-blinded strategy, as  
20 both study participants and site visit teams are not disclosed the outlier status of  
21 individual ICUs. These methodological innovations will allow us to evaluate not only the  
22 usage of positive deviance and rapid qualitative inquiry methods in healthcare, but also  
23 test rapid team ethnography as a research tool. Our hope is that our methodological  
24 evaluations will make as significant an impact as the new innovations we identify to help  
25 improve intensive care.  
26  
27  
28  
29  
30

### 31 **Acknowledgments**

32  
33 The authors would like to thank Hilary King, Lloyd Provost, David Spiegelhalter, and  
34 Scott Halpern for providing thoughtful commentary and guidance towards the  
35 development of this protocol.  
36  
37

### 38 **Authors' Contributions**

39  
40 JJ, HC, MR, KV, TW, and AM contributed significantly to the initial conceptualization of  
41 the project. JJ and HC were responsible for the study design. The quantitative analysis  
42 was conducted by JS, HC, and TW. The qualitative site visit team included JJ, RP, and  
43 DB. HC drafted the initial manuscript, and JJ, MR, KV, BR, TW, and AM provided  
44 substantial feedback for intellectual content on initial drafts. All authors approved the  
45 final copy.  
46  
47

### 48 **Funding**

49  
50 This work was supported by The Gordon and Betty Moore Foundation grant number  
51 4719 and the Stanford University Clinical Excellence Research Center. The following  
52 authors received salary support from this grant: HC, JS, AM, TW.  
53  
54  
55  
56  
57  
58  
59  
60

## Competing Interests statement

None declared.

## Data Sharing Statement

Due to the highly sensitive nature of the data collected, qualitative and quantitative databases will not be shared with others to protect study participants.

## License Statements

“The Corresponding Author has the right to grant on behalf of all authors and does grant on behalf of all authors, an exclusive licence (or non-exclusive for government employees) on a worldwide basis to the BMJ Publishing Group Ltd and its Licensees to permit this article (if accepted) to be published in BMJ Open and any other BMJPG products to exploit all subsidiary rights, as set out in our licence <http://journals.bmj.com/site/authors/editorial-policies.xhtml#copyright> and the Corresponding Author accepts and understands that any supply made under these terms is made by BMJPG to the Corresponding Author. All articles published in BMJ Open will be made available on an Open Access basis (with authors being asked to pay an open access fee - see <http://bmjopen.bmj.com/site/about/resources.xhtml>) Access shall be governed by a Creative Commons licence – details as to which [Creative Commons](#) licence will apply to the article are set out in our licence referred to above.”

“This is an open access article distributed in accordance with the Creative Commons Attribution Non Commercial (CC BY-NC 4.0) license, which permits others to distribute, remix, adapt, build upon this work non-commercially, and license their derivative works on different terms, provided the original work is properly cited and the use is non-commercial. See: <http://creativecommons.org/licenses/by-nc/4.0>.”

## Bibliographic References

- 1 Halpern NA, Pastores SM. Critical care medicine in the United States 2000-2005: an analysis of bed numbers, occupancy rates, payer mix, and costs. *Crit Care Med*. 2010;38:65–71.
- 2 Halpern SD, Ubel PA, Asch DA. Harnessing the power of default options to improve health care. *N Engl J Med*. 2007;357:1340–4.
- 3 Halpern NA, Pastores SM. Critical care medicine beds, use, occupancy, and costs in the United States: A methodological review. *Crit Care Med*. 2015;43:2452–9.
- 4 Nguyen YL, Kahn JM, Angus DC. Reorganizing adult critical care delivery: the role of regionalization, telemedicine, and community outreach. *Am J Respir Crit*

- 1  
2  
3 *Care Med.* 2010;181:1164–9.
- 4 5 Pronovost P, Needham D, Berenholtz S, *et al.* An Intervention to Decrease  
5 6 Catheter-Related Bloodstream Infections in the ICU. *N Engl J Med.*  
6 7 2006;355:2725–32.
- 8 6 Knaus WA, Wagner DP, Zimmerman JE, *et al.* Variations in Mortality and Length  
9 of Stay in Intensive Care Units. *Ann Intern Med.* 1993;118:753–61.
- 10 7 Kahn JM, Rubenfeld GD, Rohrbach J, *et al.* Cost Savings Attributable to  
11 12 Reductions in Intensive Care Unit Length of Stay for Mechanically Ventilated  
12 13 Patients. *Med Care.* 2008;46:1226–33.
- 14 8 Kahn JM, Goss CH, Heagerty PJ, *et al.* Hospital volume and the outcomes of  
15 16 mechanical ventilation. *N Engl J Med.* 2006;355:41–50.
- 17 9 Rubenfeld GD, Scales DC. Organizational Change in Critical Care. In: Scales DC,  
18 19 Rubenfeld GD, eds. *The Organization of Critical Care.* New York: Humana Press;  
20 21 2014. p. 3–8.
- 22 10 Zimmerman JE, Shortell SM, Rousseau DM, *et al.* Improving intensive care:  
23 24 observations based on organizational case studies in nine intensive care units: a  
25 26 prospective, multicenter study. *Crit Care Med.* 1993;21:1443–51.
- 27 11 Sakr Y, Moreira CL, Rhodes A, *et al.* The impact of hospital and ICU  
28 29 organizational factors on outcome in critically ill patients: results from the  
30 31 extended prevalence of infection in intensive care study. *Crit Care Med.*  
32 33 2015;43:519–26.
- 34 12 Checkley W, Martin GS, Brown SM, *et al.* Structure, process, and annual ICU  
35 36 mortality across 69 centers. *Crit Care Med.* 2014;42:344–56.
- 37 13 Pronovost P, Berenholtz S, Dorman T, *et al.* Improving communication in the ICU  
38 39 using daily goals. *J Crit Care.* 2003;18:71–5.
- 40 14 Kaplan HC, Brady PW, Dritz MC, *et al.* The influence of context on quality  
41 42 improvement success in health care: a systematic review of the literature. *Milbank*  
43 44 *Q.* 2010;88:500–59.
- 45 15 Baxter R, Taylor N, Kellar I, *et al.* What methods are used to apply positive  
46 47 deviance within healthcare organisations? A systematic review. *BMJ Qual Saf.*  
48 49 2016;:bmjqs-2015-004386.
- 50 16 Lawton R, Taylor N, Clay-Williams R, *et al.* Positive deviance: a different  
51 52 approach to achieving patient safety. *BMJ Qual Saf.* 2014;23:880–3.
- 53 17 Bradley EH, Curry LA, Ramanadhan S, *et al.* Research in action: using positive  
54 55 deviance to improve quality of health care. *Implement Sci.* 2009;4:25.
- 56 18 Baxter R, Taylor N, Kellar I, *et al.* Learning from positively deviant wards to  
57 58 improve patient safety: an observational study protocol. *BMJ Open.*  
59 2015;5:e009650.
- 60 19 Rose AJ, McCullough MB. A Practical Guide to Using the Positive Deviance  
Method in Health Services Research. *Health Serv Res.* 2016;2010:1–16.
- 20 American Hospital Association. *AHA Hospital Statistics 2016.* Chicago: Health  
Forum. 2016.
- 21 Lilford R, Pronovost P. Using hospital mortality rates to judge hospital  
performance: a bad idea that just won't go away. *BMJ.* 2010;340:c2016.
- 22 Girling AJ, Hofer TP, Wu J, *et al.* Case-mix adjusted hospital mortality is a poor  
proxy for preventable mortality: a modelling study. *BMJ Qual Saf.* 2012;21:1052–6.

- 1  
2  
3 23 Pitches DW, Mohammed M a, Lilford RJ. What is the empirical evidence that  
4 hospitals with higher-risk adjusted mortality rates provide poorer quality care? A  
5 systematic review of the literature. *BMC Health Serv Res*. 2007;7:91.  
6  
7 24 Kozar R a, Holcomb JB, Xiong W, *et al*. Are all deaths recorded equally? The  
8 impact of hospice care on risk-adjusted mortality. *J Trauma Acute Care Surg*.  
9 2014;76:634–41.  
10  
11 25 Rapoport J, Teres D, Zhao Y, *et al*. Length of stay data as a guide to hospital  
12 economic performance for ICU patients. *Med Care*. 2003;41:386–97.  
13  
14 26 Combes A, Luyt CE, Trouillet JL, *et al*. Adverse effect on a referral intensive care  
15 unit's performance of accepting patients transferred from another intensive care  
16 unit. *Crit Care Med*. 2005;33:705–10.  
17  
18 27 Kahn JM, Kramer AA, Rubenfeld GD. Transferring critically ill patients out of  
19 hospital improves the standardized mortality ratio: A simulation study. *Chest*.  
20 2007;131:68–75.  
21  
22 28 Vasilevskis EE, Kuzniewics MW, Dean ML, *et al*. Relationship Between Discharge  
23 Practices and Intensive Evidence of a Discharge Bias. *Med Care*. 2009;47:803–  
24 12.  
25  
26 29 Rosenberg AL, Hofer TP, Strachan C, *et al*. Accepting critically ill transfer patients:  
27 adverse effect on a referral center's outcome and benchmark measures. *Ann*  
28 *Intern Med*. 2003;138:882–90.  
29  
30 30 Cerner Corporation. *The APACHE IV Equations: Benchmarks for Mortality and*  
31 *Resource Use (white paper)*. Kansas City: Cerner; 2005.  
32  
33 31 Nicholl J, Jacques RM, Campbell MJ. Direct risk standardisation: a new method  
34 for comparing casemix adjusted event rates using complex models. *BMC Med*  
35 *Res Methodol*. 2013;13:133.  
36  
37 32 Gatz DF, Smith L. The standard error of a weighted mean concentration: I.  
38 Bootstrapping vs other methods. *Atmos Environ*. 1995;29:1185–93.  
39  
40 33 Wood M. Bootstrapped Confidence Intervals as an Approach to Statistical  
41 Inference. *Organ Res Methods*. 2005;8:454–70.  
42  
43 34 Efron B, Gong G. A Leisurely Look at the Bootstrap, the Jackknife, and Cross-  
44 Validation. *Am Stat*. 1983;37:36–48.  
45  
46 35 Jones HE, Ohlssen DI, Spiegelhalter DJ. Use of the false discovery rate when  
47 comparing multiple health care providers. *J Clin Epidemiol*. 2008;61.  
48  
49 36 Beebe J. *Rapid Qualitative Inquiry*. 2nd ed. London: Rowman & Littlefield; 2014.  
50  
51 37 Damschroder LJ, Aron DC, Keith RE, *et al*. Fostering implementation of health  
52 services research findings into practice: a consolidated framework for advancing  
53 implementation science. *Implement Sci*. 2009;4:50.  
54  
55 38 Nilsen P. Making sense of implementation theories, models and frameworks.  
56 *Implement Sci*. 2015;10:53.  
57  
58 39 Bernard H. *Research Methods in Anthropology*. 5th ed. Walnut Creek: AltaMira;  
59 2011.  
60  
61 40 Guest G, Bunce A, Johnson L. How Many Interviews Are Enough ? An  
62 Experiment with Data Saturation and Variability. *Field methods*. 2006;18:59–82.  
63  
64 41 Bradley EH, Curry LA, Ramanadhan S, *et al*. Research in action : using positive  
65 deviance to improve quality of health care. 2009;11:1–11.  
66  
67 42 Beebe J. *Rapid Assessment Process*. Walnut Creek: AltaMira; 2004.

- 1  
2  
3 43 Emerson RM, Fretz RI, Shaw LL. *Writing Ethnographic Fieldnotes*. 2nd ed.  
4 Chicago: University of Chicago Press; 2001.  
5 44 Creswell JW. *Qualitative Inquiry and Research Design*. 3rd ed. Thousand Oaks:  
6 SAGE Publications; 2012.  
7 45 Bernard HR, Wutich A, Ryan GW. *Analyzing Qualitative Data: Systematic*  
8 *Approaches*. 2nd ed. Thousand Oaks: SAGE Publications; 2017.  
9 46 Dedoose. Version 7.0.23 [software]. SocioCultural Research Consultants. 2016  
10 [cited 2017 Jan 10]. Available from: <http://www.dedoose.com>.  
11 47 Yin RK. *Case Study Research*. 3rd ed. Thousand Oaks: SAGE Publications; 2003.  
12 48 de Lange DW. The Pitfalls of Benchmarking ICUs. *Crit Care Med*. 2015;43:473–4.  
13 49 Kramer AA, Higgins TL, Zimmerman JE. Comparing Observed and Predicted  
14 Mortality Among ICUs Using Different Prognostic Systems. *Crit Care Med*.  
15 2015;43:261–9.  
16  
17  
18  
19  
20  
21  
22  
23  
24  
25  
26  
27  
28  
29  
30  
31  
32  
33  
34  
35  
36  
37  
38  
39  
40  
41  
42  
43  
44  
45  
46  
47  
48  
49  
50  
51  
52  
53  
54  
55  
56  
57  
58  
59  
60

**SUPPLEMENTARY FILE 1:****Interview Guide****INTERVIEWER INSTRUCTIONS**

The questions below are not meant to be asked verbatim, nor asked necessarily in the order given here. Instead, they are meant to illustrate potential prompts that may be useful in eliciting participant responses within each domain. Your interview should be guided by the participant as much as the key domains below.

**INTRO QUESTIONS**

*// Intended to probe unit culture and experiences of the interviewee in an open-ended manner. //*

Tell us what it's like to work here.

Has working here changed over the time that you've been here? How?

What are some of the important working systems or practices that you have in place on the unit?

How are rounds done in your unit? Who participates? Are there particular practices that you think are unique to your unit in relation to rounds?

How do you know what the plan is for your patient(s)?

What are some of the biggest challenges to working here?

**FRAMING FOR DOMAIN-BASED SECTIONS**

We are particularly interested in how communication and work processes affect mortality rates and length of stay for patients. We've found that it is often useful to talk about these issues in the context of concrete examples, and so gear many questions toward patient progression and quality improvements on the unit. However, we invite you to think more broadly if other things come to mind related to these outcomes while we are asking these questions.

----

**DOMAIN 1 – UNIT PRACTICES AND COMMUNICATION**

*// Intended to probe: Unit-level practices that help move patients toward discharge. How front line staff communicates about patient plans. //*

I am going to move on to a few questions about communication around patient plans. In this section, we are focused on what we call "just right" patients. For us, these are patients "well-suited" for the ICU, i.e., not patients boarding in the ICU waiting for a lower level of care, or patients who are in the end of life/palliative category.

-----

1  
2  
3 Think about a 'just right' patient who you currently have on your list. How do you get information about this patient's  
4 plan? Do you get the same plan from everyone? When there is a discrepancy, why is that?  
5

6 How are you typically notified of a change in plans?  
7

8 How do you make sure to progress that patient toward discharge in a safe and timely manner? What specific things  
9 do you do?  
10

11 When complications arise, how is this handled? Does the plan change? How does the team communicate about this  
12 complication?  
13

14 When you talk about complications with your team, is it a warm and welcome environment? Punitive?  
15

16 (Normalize the fact that complications exist on the unit so staff can speak more openly.)  
17

18 Are patient plans managed 24/7?  
19

20 What role does the eICU play in the unit? What role does it play in patient progression?  
21  
22  
23

#### 24 **DOMAIN 1.2 – EFFECTIVE PATIENT PROGRESSION EXAMPLE**

25  
26 Think of a recent time where you felt like you effectively managed a 'just right' patient in a safe and timely manner.  
27 Tell me what happened and why you felt like this was effective.  
28

29 In your experience, how typical are these cases? What increases the likelihood of them happening?  
30  
31  
32  
33

#### 34 **DOMAIN 1.3 – INEFFECTIVE PATIENT PROGRESSION EXAMPLE**

35  
36 Think of a recent time where you felt like you did NOT effectively manage a 'just right' patient in a safe and timely  
37 manner. Tell me what happened and why you felt like it was ineffective.  
38

39 In your experience, how typical are those types cases? What increases the likelihood of these cases happening?  
40  
41  
42

#### 43 **DOMAIN 2 – QUALITY IMPROVEMENT**

44  
45 *// Intended to probe opinions on quality improvement efforts and outcomes. //*  
46

47 Ask about the concrete improvements and initiatives that have been previously mentioned by the unit director or  
48 other staff. Use people's local languages and examples as much as possible to make the questions relevant to the  
49 interviewed population.  
50

51 Are there specific initiatives that have been implemented to improve outcomes on the unit? If yes, give some  
52 examples.  
53

54 We spoke with \_\_\_\_\_, who mentioned \_\_\_\_\_ changes that have been put in place. Can you talk about  
55 how these are have been implemented?  
56  
57



1  
2  
3 Are these \_\_\_\_\_ efforts “worth it”?  
4

5 What are leadership factors that allow for continuous improvement of the unit?  
6

7 How often are there discussions with all staff about quality improvement? What are those discussions typically like?  
8 Do you ever give feedback?  
9

10 Important probe: Do you feel listened to?  
11

12 Does your management share data on your unit’s performance? Do you look at these data?  
13

14 Can you think about a time when a unit level quality improvement effort/program was rolled out and worked well?  
15 Describe to me what occurred.  
16

17 Probe: How was it rolled out? Was the staff involved in roll out?  
18

19 Can you think about a time when a unit level quality improvement effort was rolled out and did NOT work well?  
20 Describe to me what occurred.  
21  
22  
23

### 24 **DOMAIN 3 – MANAGEMENT/FRONTLINE STAFF DISCONNECTS AND CONNECTIONS**

25  
26 *// Intended to triangulate management perceptions with those of the frontline staff. //*  
27

28 *// Intended to probe how/if there are any unit level factors that help frontline staff progress their patients in a safe  
29 and timely manner. //*  
30

31 In general, a unit should function well in order for individual patients to progress and the unit to function. How does  
32 your leadership enable your unit to function maximally? What challenges affect communication or alignment between  
33 frontline staff and unit management?  
34

35  
36  
37 What are unit level factors that enable your frontline patient care processes regularly and efficiently?  
38  
39  
40

### 41 **CLOSING**

42  
43 *// Intended to allow for additional observations. //*  
44

45 What else have we not talked about yet that you feel affects mortality rates or length of stay for patients?  
46  
47

48 Anything else that you would like for us to know about working on this unit, or your thoughts on the issues  
49 presented here?  
50

51 Who else should we speak with?  
52  
53  
54  
55  
56  
57

# BMJ Open

## Detecting organizational innovations leading to improved ICU outcomes: a protocol for a double-blinded national positive deviance study of critical care delivery

|                                 |                                                                                                                                                                                                                                                                                                                                                                                                                                                                                                                                                                                                                                                                                                                                  |
|---------------------------------|----------------------------------------------------------------------------------------------------------------------------------------------------------------------------------------------------------------------------------------------------------------------------------------------------------------------------------------------------------------------------------------------------------------------------------------------------------------------------------------------------------------------------------------------------------------------------------------------------------------------------------------------------------------------------------------------------------------------------------|
| Journal:                        | <i>BMJ Open</i>                                                                                                                                                                                                                                                                                                                                                                                                                                                                                                                                                                                                                                                                                                                  |
| Manuscript ID                   | bmjopen-2017-015930.R1                                                                                                                                                                                                                                                                                                                                                                                                                                                                                                                                                                                                                                                                                                           |
| Article Type:                   | Protocol                                                                                                                                                                                                                                                                                                                                                                                                                                                                                                                                                                                                                                                                                                                         |
| Date Submitted by the Author:   | 29-Mar-2017                                                                                                                                                                                                                                                                                                                                                                                                                                                                                                                                                                                                                                                                                                                      |
| Complete List of Authors:       | Chiou, Howard; Stanford University, Clinical Excellence Research Center; Emory University School of Medicine, Medical Scientist Training Program and Department of Anthropology<br>Jopling, Jeffrey; Stanford University, Clinical Excellence Research Center; Gordon and Betty Moore Foundation<br>Scott, Jennifer; Stanford University, Clinical Excellence Research Center<br>Ramsey, Meghan; Stanford University, Clinical Excellence Research Center<br>Vranas, Kelly; Stanford University, Clinical Excellence Research Center; Oregon Health & Science University<br>Wagner, Todd; Stanford University, Clinical Excellence Research Center<br>Milstein, Arnold; Stanford University, Clinical Excellence Research Center |
| <b>Primary Subject Heading</b>: | Health services research                                                                                                                                                                                                                                                                                                                                                                                                                                                                                                                                                                                                                                                                                                         |
| Secondary Subject Heading:      | Intensive care, Qualitative research, Medical management                                                                                                                                                                                                                                                                                                                                                                                                                                                                                                                                                                                                                                                                         |
| Keywords:                       | Organisation of health services < HEALTH SERVICES ADMINISTRATION & MANAGEMENT, Quality in health care < HEALTH SERVICES ADMINISTRATION & MANAGEMENT, INTENSIVE & CRITICAL CARE, QUALITATIVE RESEARCH                                                                                                                                                                                                                                                                                                                                                                                                                                                                                                                             |
|                                 |                                                                                                                                                                                                                                                                                                                                                                                                                                                                                                                                                                                                                                                                                                                                  |

SCHOLARONE™  
Manuscripts

**Title (50 words)**

Detecting organizational innovations leading to improved ICU outcomes: a protocol for a double-blinded national positive deviance study of critical care delivery.

**Authors**

Howard Chiou\*<sup>1,3</sup>, Jeffrey K. Jopling\*<sup>1,2</sup>, Jennifer Yang Scott<sup>1</sup>, Meghan Ramsey<sup>1</sup>, Kelly Vranas<sup>1,4</sup>, Todd H. Wagner<sup>1</sup>, Arnold Milstein<sup>1</sup>

\* Co-authors

1 Clinical Excellence Research Center, Stanford University, Stanford, CA, United States.

2 Gordon and Betty Moore Foundation, Palo Alto, CA, United States.

3 Emory University School of Medicine Medical Scientist Training Program and Department of Anthropology, Emory University, Atlanta, GA, United States.

4 Oregon Health & Science University, Portland, OR, United States.

*Correspondence to:* Howard Chiou; [howard.chiou@stanford.edu](mailto:howard.chiou@stanford.edu)

**Abstract (300 words)**

*Introduction:* There is substantial variability in intensive care unit (ICU) utilization and quality of care. However, the factors that drive this variation are poorly understood. This study utilizes a novel adaptation of positive deviance approach— a methodology used in public health that assumes solutions to challenges already exist within the system to detect innovations that are likely to improve intensive care.

*Methods and Analysis:* We used the Philips eICU Research Institute database (eRI), containing 3.3 million patient records from over 50 health systems across the United States. Acute Physiology and Chronic Health Evaluation (APACHE) IVa scores were used to identify the study cohort, which included ICU patients whose outcomes were felt to be most sensitive to organizational innovations. The primary outcomes included mortality and length of stay. Outcome measurements were directly standardized, and bootstrapped confidence intervals calculated with adjustment for false discovery rate. Using purposive sampling, we then generated a blinded list of 5 positive outliers and 5 negative comparators.

Using rapid qualitative inquiry, blinded interdisciplinary site visit teams will conduct interviews and observations using a team ethnography approach. After data collection is completed, the data will be unblinded and analyzed using a cross-case method to

1  
2  
3 identify themes, patterns, and innovations using a constant comparative grounded  
4 theory approach. This process not only allows for the detection of innovations in  
5 intensive care, but also support an evaluation of how positive deviance and rapid  
6 qualitative inquiry methods can be adapted to healthcare.  
7

8  
9 *Ethics and Dissemination:* The study protocol was approved by the Stanford University  
10 Institutional Review Board (Reference: 39509). We plan on publishing study findings  
11 and methodological guidance in peer-reviewed academic journals, white papers, and  
12 presentations at conferences.  
13

## 14 15 16 **Strengths and Limitations**

- 17  
18 • This study is a methodologically innovative translation of the positive deviance  
19 approach to health services research, and incorporates both qualitative and  
20 quantitative rigor.  
21
- 22 • A national database of ICU care in the United States is used, and the  
23 methodology is a mixed-methods approach that triangulates between qualitative  
24 and quantitative data sources.  
25
- 26 • The project is likely to inform the organization of care delivery in ICUs, as well as  
27 both positive deviance and rapid qualitative methodologies in healthcare.  
28
- 29 • The database is limited to ICUs with telemedicine capabilities, and case-mix  
30 adjustment using APACHE IVa is imperfect. Study participants and site visitors  
31 may also not be able to accurately ascertain which innovations drive  
32 performance.  
33

## 34 35 36 **Introduction**

37  
38 Critical illness represents an enormous burden in the United States, with more than 5  
39 million patients admitted annually to ICUs [1]. Caring for these patients consumes a  
40 disproportionate amount of resources; despite comprising fewer than 10% of all hospital  
41 beds, ICUs accounts for 13.4% of total hospital costs and 0.66% of the national gross  
42 domestic product.[2] This burden will likely increase with the aging population, as both  
43 utilization rate and the proportion of beds allocated to intensive care rise.[2–5]  
44  
45

46  
47 Yet, the quality of care delivered varies dramatically between units and hospitals. ICUs  
48 differ widely in their rates of compliance with best practices and rates of avoidable  
49 complications (e.g., hospital acquired infections).[6] Risk-adjusted mortality also differs  
50 among ICUs, with studies suggesting that high performing ICUs in the country have up  
51 to 10-12 fewer deaths for every 100 patients than the lowest performing ICUs, even  
52 after controlling for factors like discharge practices and patient demographics.[7] These  
53 trends have been confirmed in more recent studies of ventilated patients.[8,9]  
54  
55  
56  
57  
58  
59

1  
2  
3 Variations in performance are likely driven by differences in ICU organization and  
4 practices, rather than by access to technology.[10,11] Modern ICUs are more an  
5 *organizational innovation* than a technological one, matching a concentration of  
6 personnel and resources for any type of critically ill patient. Previous research has  
7 identified organizational factors like RN-to-patient ratios, daily care plans, and usage of  
8 care bundles as associated with improved risk-adjusted mortality.[12–14]  
9

10  
11 Unfortunately, innovations in organization and practice are not well described in the  
12 critical care literature. Hospitals do not typically share their innovative practices with one  
13 another, and data to compare ICU performance are not readily available. Although  
14 some practices may be published, context is frequently not reported in sufficient detail  
15 to ensure successful implementation.[15] All of these factors obscure our ability to  
16 identify which aspects of critical care organization and practices help drive performance.  
17  
18

19 Positive deviance is one methodology that may offer additional insights. This approach  
20 assumes that innovations that address problems common to many organizations have  
21 already been developed, and can be detected by studying positive outliers before being  
22 tested and disseminated.[16,17] Originating from global health, the approach has been  
23 used successfully in a wide variety of settings to improve healthcare quality, including  
24 diabetes management in primary care practices, and hospital door-to-balloon times in  
25 response to acute myocardial infarction.[18, 19]  
26  
27

28 However, a systematic review of positive deviance studies in healthcare found research  
29 quality to be low, and there have been very few applications of the approach in the  
30 critical care setting.[16] Highlighting the need for increased rigor, a previous study  
31 utilizing qualitative site visits failed to identify differences between ICUs associated with  
32 performance.[11] The goal of this research protocol is to describe our methods for  
33 conducting a positive deviance study in critical care. Specifically, we sought to identify  
34 organizational innovations in the delivery of critical care, adapting the first two steps of  
35 the positive deviance approach to generate hypotheses as to which innovations explain  
36 variation in ICU utilization and quality of care. A secondary objective was to identify  
37 potential organizational structures, processes, and contexts that may explain this  
38 variation. Through these aims, we hope to not only detect innovations in intensive care,  
39 but also support an evaluation of how positive deviance and rapid qualitative inquiry  
40 methods can be adapted to healthcare.  
41  
42  
43  
44  
45  
46

## 47 **Methods and Analysis**

48 Conducting a positive deviance study requires four steps: 1) identify outliers within an  
49 area of interest, 2) utilize qualitative approaches to generate hypotheses to explain their  
50 performance, 3) test hypotheses in a larger sample, and 4) disseminate evidence about  
51 best practices.[20,21] Our strategy utilizes a blinded, retrospective approach in the two  
52 first steps. We analyzed a national database of ICUs to develop a study cohort of five  
53 positive outliers and five comparator ICUs. This quantitative phase will be followed by  
54  
55  
56  
57  
58  
59  
60

1  
2  
3 in-depth qualitative work at these ten sites, where we will build comparative case  
4 studies on their innovations and themes.  
5  
6  
7

## 8 **Quantitative Phase: Identifying Outliers**

### 9 *Data Source*

10 We used data from the Philips eICU Research Institute database (eRI), containing over  
11 3.3 million patient records from over 50 health systems from 2003 through 2015. All  
12 ICUs in the database have implemented the Philips eICU telemedicine system. Data for  
13 ICU admissions includes vital sign measurements, quality metrics, medication orders,  
14 and patient laboratory values. All of the ICUs in the study were offered an opportunity to  
15 opt-out of the study, and the protected health information of individual patients was not  
16 included. The database includes over 400 hospitals; as of 2014, there were 5,686 acute  
17 care hospitals in the United States, all of which had at least one ICU.[22]  
18  
19  
20  
21

### 22 *ICU Cohort Selection*

23 Inclusion criteria included all hospital units that contributed data to the Philips eRI  
24 database between 2013 and 2015. We excluded hospital units who did not participate  
25 for all three years, as well as self-identified stepdown or intermediate care units. To  
26 minimize variation from small sample sizes, we also excluded low-volume ICUs, defined  
27 as ICUs with fewer than 300 discharges per year. The final cohort included 276 ICUs  
28 that cared for a total of 370,278 patients over three years. These ICUs form a  
29 geographically diverse sample of ICUs with eICU capabilities.  
30  
31  
32

### 33 *Outcome Measurements*

34  
35 Primary outcomes included mortality and length of stay for patients admitted to the ICU,  
36 since these parameters reflect both ICU quality and utilization. While mortality rates are  
37 generally low in critical care and thus insensitive to use in comparisons,[23–25] rates of  
38 deaths are sufficiently high enough among ICU patients to be used as a quality  
39 indicator.[7] As patients may be transferred elsewhere in the hospital as death nears,[26]  
40 ICU patient mortality rates were calculated using deaths that occurred both in the ICU  
41 (in-ICU mortality), and including deaths after transfer elsewhere within the hospital  
42 (combined post-transfer mortality).  
43  
44

45 The eRI database does not include any cost estimates. We used length of stay used as  
46 a proxy for resource utilization, since up to 85% of ICU costs are explained by length of  
47 stay alone.[27] In this study, we calculated a mean residual for each ICU, utilizing the  
48 difference between observed and expected lengths of stay (OMELOS) as predicted by  
49 the APACHE IVa algorithm. Patients who died before discharge were excluded. As with  
50 mortality, we calculated length of stay including only ICU lengths of stay (in-ICU length  
51 of stay), and including days after transfer elsewhere within the hospital (combined post-  
52 transfer length of stay).  
53  
54  
55  
56  
57  
58  
59  
60

### *Patient Cohort Selection*

The variation in outcomes between ICUs are mostly dominated by those who are very healthy or very sick. For example, ICU metrics are greatly skewed by low-risk patients admitted to the ICU purely for monitoring purposes, and by high-risk patients for whom death may be a likely outcome. Consequently, included only patients who have a predicted risk of death between 2% and 20%, as predicted by the APACHE IVa algorithms. Patients without calculated APACHE IVa scores were excluded. These limits were based on expert consensus among clinicians familiar with the APACHE IVa scoring system.

Patients transferred between hospitals were also excluded from the study. Transfer status from another institution is an independent risk factor for mortality, even after controlling for case-mix.[28] Small numbers of transfer patients dramatically affect mortality rates,[29–31] and transfers are excluded from the APACHE IVa models.[30] In order to control for this “transfer bias”, we excluded all patients who were transferred from another institution. We also excluded patients with extreme outlier unit lengths of stay above 300 days.

### *Direct Risk Standardization*

In order to enable direct comparison of outcomes between each ICU, direct risk standardization was used to adjust for variations in case-mix.[33] In summary, we calculated a weighted average for each outcome variable using 2 percentage point increment risk groups based on APACHE IVa-predicted ICU mortality (e.g., 2-4%, ..., and 18-20%). The weights were equal to the proportion of the number of patient records within each risk group. Weighted average mortality rates and lengths of stay were calculated for all patient records for each individual ICU. ICUs with less than 300 patient records for those within the 2-20% APACHE IVa-predicted mortality were excluded to eliminate extreme variations due to small sample sizes.

### *Bootstrapped Variance and Percentile Confidence Intervals*

As risk adjustment was performed utilizing direct risk standardization, all adjusted outcome variables were weighted means. Unlike the arithmetic mean, no analytical analog of the standard error exists for weighted means.[34] Therefore, we estimated confidence intervals through bootstrapping.[35,36] All outcome variables were calculated for each ICU, utilizing 5000 resamples with replacement equal to the total number of patient records for each individual ICU. Variance and percentile confidence intervals were then calculated for each ICU.

### *Outlier Identification and False Discovery Rate Control*

Outlier and comparator ICUs were defined as ICUs with confidence intervals that do not overlap with the population mean ( $\alpha \leq 0.05$ ). P-values were generated for each ICU using a two-sided student's t test, and then adjusted for false discovery rate ( $d < .05$ )

1  
2  
3 using the Benjamin-Hochberg procedure.[37] This process was repeated for each of the  
4 four outcome variables (i.e., in-ICU mortality, combined post-transfer mortality, in-ICU  
5 length of stay, and combined post-transfer length of stay), and visualized using  
6 caterpillar plots sorted by confidence interval limits. ICUs identified as outliers on all four  
7 outcome variables were placed into positive outlier and negative comparator groups,  
8 respectively.  
9

## 10 11 12 13 14 15 16 **Qualitative Phase: Detecting Innovations**

### 17 18 *Site Selection*

19  
20 Two members of our study team (HC and MR) were provided with an unblinded list of  
21 ICUs identified as positive outliers and negative comparators. A purposive sample of 5  
22 positive outliers and 5 negative comparators were selected, utilizing a maximum  
23 variation approach based on the following institutional characteristics: 1) ICU type, 2)  
24 patient volume, 3) academic affiliation, 4) presence of intermediate care units, 5) case-  
25 mix of ICU, 6) geographic locale, 7) urban or rural, and 8) health system.[18] The site  
26 visit teams were then provided with a blinded list of these ICUs for recruitment. The  
27 sample size of 10 sites is based on previous research establishing ten sites as likely to  
28 achieve thematic saturation for positive deviance studies in healthcare.[21]  
29  
30

### 31 32 *Site Visits*

33  
34 We adapted the team-based Rapid Qualitative Inquiry (RQI) methodologies used in  
35 public health and applied anthropology, which rests on building rapport quickly,  
36 triangulating across multiple sources of data, and a multidisciplinary research team.[38]  
37 The blinded RQI team includes a surgeon and systems engineer (JJ), a registered ICU  
38 nurse and administrative fellow (DB), and a healthcare researcher (RP)— all trained by  
39 two applied anthropologists (HC and HK). The research team will collect and analyze  
40 three key data sources: 1) semi-structured interviews, 2) unstructured observations, and  
41 3) extant data.  
42  
43

44 The Consolidated Framework for Implementation Research (CFIR) will be used as a  
45 theoretical framework to guide both data collection and subsequent analysis.[39] CFIR  
46 is a determinant framework consisting of constructs known to be associated with  
47 effective implementation, and intended to guide evaluations and implementation  
48 strategy.[39,40] As the CFIR constructs include interventions, individuals, organizational  
49 context, and organizational processes, this framework provides both a typology and  
50 terminology to evaluate interventions and their context.  
51  
52  
53  
54  
55  
56  
57  
58  
59  
60



### *Semi-structured Team Interviews and Focus Groups*

Bedside staff and unit managers will be recruited for interviews utilizing a combination of key informant, snowball, and opportunistic sampling.[41] Recruitment will occur using a maximum variation approach, aiming to capture a wide variety of perspectives at each site from across the hierarchy, including doctors, nurses, nursing technicians, and unit managers. Teams will recruit at least six to eight participants at each site, a sample size found previously to be usually sufficient for thematic saturation in healthcare positive deviance.[21,42]

All interviews will be semi-structured, and utilize an interview guide that broadly addresses three key domains: unit-practices and communication, quality improvement, and relationships between management and frontline staff. The interviews will seek to identify innovations in these key domains and generate testable hypotheses that may explain variations in performance.[43] All interviews will be conducted in private settings, digitally recorded, and transcribed verbatim by professional transcriptionists.

### *Unstructured Observations*

Observational data are particularly important for rapid qualitative approaches, as they provide a point of triangulation against data from interviews.[44] Our strategy requires observational data obtained using ethnographic methodologies, which are designed to access the typical routines and conditions of a field site.[45] Site visit teams will conduct at least two hours of direct observation in each ICU, including physician rounds, nursing shift changes, cardiopulmonary resuscitations, and fixed observation at nursing stations and eICU command centers. Each researcher will systematically generate descriptive field notes, including observed behaviors, processes, and environmental features.[41] These unstructured observations also provide opportunities to build rapport and conduct informal interviews with bedside staff.

### *Extant Data*

Collection of contextual data is a critical component of RQI, and provides an additional basis from which hypotheses can be triangulated.[38] For example, site visit teams may encounter training documents, written policies, news reports, or locally collected data. With permission, these data will be digitized into the research database, and analyzed as described below.

### *Rapid Continuous Constant Comparative Analysis*

This project will adapt a team-based, continuous analysis methodology commonly used in rapid qualitative approaches.[38] Considered critical to a team ethnographic approach, site visit teams will debrief as often as possible, reviewing field notes and interviews to generate potential hypotheses and innovations for each field site. The main purpose is to generate analytical field notes in a modified grounded theory approach, generating

1  
2  
3 themes and causal explanations grounded in the data.[46,47] While classic grounded  
4 theory emphasizes a primarily inductive approach, we will include a mixed grounded  
5 theory and content analysis as typical of rapid qualitative research[38, 47].  
6  
7

8 All field notes, preliminary reports, interview transcripts, and any extant data are then  
9 imported to Dedoose, a qualitative analysis software designed for teams.[48] All data  
10 will then be inductively coded using a combination of grounded theory and constant  
11 comparative methods, extending the formal codebook of themes identified during team  
12 debriefs. As site visit teams remain blinded to each site's outlier status, a constant  
13 comparative method will be used to generate causal models of factors and innovations,  
14 assessing the possibility that a field site is a positive outlier or negative comparator site  
15 in turn. Additional field notes are generated in this process ("memoing"), and a  
16 preliminary report for each site visit is generated.[38]  
17  
18

### 19 *Cross-Case Analysis*

20  
21 All members of the study team will then be unblinded as to each sites' outlier status,  
22 and all data sources will be analyzed using a cross-case method.[49] Relevant  
23 qualitative and quantitative data points will be entered into a matrix, organized by  
24 themes of interest identified during site visits, as well as the outlier status of each site.  
25 The data will then be interrogated for patterns, themes, similarities, and differences  
26 between the outlier and comparison sites. Causal models developed during the  
27 generation of preliminary reports will then be extended across multiple sites.  
28  
29  
30

### 31 **Ethics and Dissemination**

32  
33 The study protocol was reviewed and approved by the Stanford University Institutional  
34 Review Board (reference: 39509). Verbal informed consent will be obtained for all  
35 participants, and interviews will remain confidential and de-identified. Any study findings  
36 will only be reported in the aggregate, and individual ICUs will never be identified in  
37 publications. Participating ICUs will not be disclosed their outlier status, but all  
38 publications and reports will be shared with recruited sites. Potential innovations will  
39 also be disseminated to participants, as well as nationally through the work at the  
40 Clinical Excellence Research Center at Stanford University. We plan on publishing  
41 study findings and methodological guidance in peer-reviewed academic journals, white  
42 papers, and presentations at academic medical conferences.  
43  
44  
45  
46  
47

### 48 **Study Status**

49  
50 The quantitative portion of this study is complete. Qualitative data collection began in  
51 September 2016, and expected to complete by April 2017. Qualitative data analysis will  
52 be completed by September 2017.  
53  
54  
55  
56  
57  
58  
59  
60

## Discussion and Limitations

We aim to extend positive deviance methods into a national study of intensive care. By focusing only on a subset of patients most likely to have lengths of stay and mortality rates affected by organizational processes and practices, this study aims to detect new innovations in the delivery of critical care. These innovations can then be tested in subsequent studies, and disseminated broadly if found to be efficacious.

There are several limitations to this study. First, the database includes only intensive care units that subscribed to the Philips eICU program. However, as the main objective of this study is to identify new organizational innovations that may drive ICU performance, the fact that all ICUs in this study have telemedicine capabilities ensures a similar level of technological access. In the United States, there are few other national databases of ICU quality, and the database is likely one of the most comprehensive data sources available.

Second, APACHE IVa is an imperfect measure of disease severity, although it remains one of the most widely used and best validated measures.<sup>[50,51]</sup> As the main purpose of the quantitative portion of this project is to identify outlier ICUs likely to harbor organizational innovations, we believe the large sample sizes in this project will also protect against this limitation.

Finally, an intrinsic risk of the positive deviance approach is that success is dependent on the ability of either the researchers or the study participants to identify the innovations leading to variations in outcome. Although the double-blinded nature of this study maximizes our ability to correctly identify successful innovations, there is an unavoidable risk that no new innovations will be identified. Replication of positive deviance studies can also be challenging, as differing site visit teams may identify different innovations as worthwhile.

This protocol, however, also contains several novel features to further the translation of positive deviance methods to healthcare services research. First, we are conducting the study with both qualitative and quantitative rigor, responding to previous criticisms of the method. Second, this study is also one of the first to utilize a double-blinded strategy, as both study participants and site visit teams are not disclosed the outlier status of individual ICUs. These methodological innovations will allow us to evaluate not only the usage of positive deviance and rapid qualitative inquiry methods in healthcare, but also test rapid team ethnography as a research tool. Our hope is that these methodological innovations will make a significant impact in improving healthcare delivery and outcomes for critically ill patients.

## Acknowledgments

The authors would like to thank Hilary King, Lloyd Provost, David Spiegelhalter, and Scott Halpern for providing thoughtful commentary and guidance towards the development of this protocol.

## Authors' Contributions

JJ, HC, MR, KV, TW, and AM contributed significantly to the initial conceptualization of the project. JJ and HC were responsible for the study design. The quantitative analysis was conducted by JS, HC, and TW. The qualitative site visit team included JJ, RP, and DB. HC drafted the initial manuscript, and JJ, MR, KV, BR, TW, and AM provided substantial feedback for intellectual content on initial drafts. All authors approved the final copy.

## Funding

This work was supported by The Gordon and Betty Moore Foundation grant number 4719 and the Stanford University Clinical Excellence Research Center. The following authors received salary support from this grant: HC, JS, AM, TW.

## Competing Interests statement

None declared.

## Data Sharing Statement

Due to the highly sensitive nature of the data collected, qualitative and quantitative databases will not be shared with others to protect study participants.

## License Statements

“The Corresponding Author has the right to grant on behalf of all authors and does grant on behalf of all authors, an exclusive licence (or non-exclusive for government employees) on a worldwide basis to the BMJ Publishing Group Ltd and its Licensees to permit this article (if accepted) to be published in BMJ Open and any other BMJ PGL products to exploit all subsidiary rights, as set out in our licence <http://journals.bmj.com/site/authors/editorial-policies.xhtml#copyright> and the Corresponding Author accepts and understands that any supply made under these terms is made by BMJ PGL to the Corresponding Author. All articles published in BMJ Open will be made available on an Open Access basis (with authors being asked to pay an open access fee - see <http://bmjopen.bmj.com/site/about/resources.xhtml>) Access shall be governed by a Creative Commons licence – details as to which [Creative Commons](#) licence will apply to the article are set out in our licence referred to above.”

“This is an open access article distributed in accordance with the Creative Commons Attribution Non Commercial (CC BY-NC 4.0) license, which permits others to distribute,

remix, adapt, build upon this work non-commercially, and license their derivative works on different terms, provided the original work is properly cited and the use is non-commercial. See: <http://creativecommons.org/licenses/by-nc/4.0>.”

## Bibliographic References

- 1 Society of Critical Care Medicine [Internet]. Critical care statistics; c2017 [cited 2017 Mar 26]. Available from <http://www.sccm.org/Communications/Pages/CriticalCareStats.aspx>.
- 2 Halpern NA, Pastores SM. Critical care medicine in the United States 2000-2005: an analysis of bed numbers, occupancy rates, payer mix, and costs. *Crit Care Med*. 2010;38:65–71.
- 3 Halpern SD, Ubel PA, Asch DA. Harnessing the power of default options to improve health care. *N Engl J Med*. 2007;357:1340–4.
- 4 Halpern NA, Pastores SM. Critical care medicine beds, use, occupancy, and costs in the United States: A methodological review. *Crit Care Med*. 2015;43:2452–9.
- 5 Nguyen YL, Kahn JM, Angus DC. Reorganizing adult critical care delivery: the role of regionalization, telemedicine, and community outreach. *Am J Respir Crit Care Med*. 2010;181:1164–9.
- 6 Pronovost P, Needham D, Berenholtz S, *et al*. An Intervention to Decrease Catheter-Related Bloodstream Infections in the ICU. *N Engl J Med*. 2006;355:2725–32.
- 7 Knaus WA, Wagner DP, Zimmerman JE, *et al*. Variations in Mortality and Length of Stay in Intensive Care Units. *Ann Intern Med*. 1993;118:753–61.
- 8 Kahn JM, Rubenfeld GD, Rohrbach J, *et al*. Cost Savings Attributable to Reductions in Intensive Care Unit Length of Stay for Mechanically Ventilated Patients. *Med Care*. 2008;46:1226–33.
- 9 Kahn JM, Goss CH, Heagerty PJ, *et al*. Hospital volume and the outcomes of mechanical ventilation. *N Engl J Med*. 2006;355:41–50.
- 10 Rubenfeld GD, Scales DC. Organizational Change in Critical Care. In: Scales DC, Rubenfeld GD, eds. *The Organization of Critical Care*. New York: Humana Press; 2014. p. 3–8.
- 11 Zimmerman JE, Shortell SM, Rousseau DM, *et al*. Improving intensive care: observations based on organizational case studies in nine intensive care units: a prospective, multicenter study. *Crit Care Med*. 1993;21:1443–51.
- 12 Sakr Y, Moreira CL, Rhodes A, *et al*. The impact of hospital and ICU organizational factors on outcome in critically ill patients: results from the extended prevalence of infection in intensive care study. *Crit Care Med*. 2015;43:519–26.
- 13 Checkley W, Martin GS, Brown SM, *et al*. Structure, process, and annual ICU mortality across 69 centers. *Crit Care Med*. 2014;42:344–56.
- 14 Pronovost P, Berenholtz S, Dorman T, *et al*. Improving communication in the ICU using daily goals. *J Crit Care*. 2003;18:71–5.
- 15 Kaplan HC, Brady PW, Dritz MC, *et al*. The influence of context on quality

- 1  
2  
3 improvement success in health care: a systematic review of the literature. *Milbank*  
4 *Q*. 2010;88:500–59.
- 5  
6 16 Baxter R, Taylor N, Kellar I, *et al*. What methods are used to apply positive  
7 deviance within healthcare organisations? A systematic review. *BMJ Qual Saf*.  
8 2016;:bmjqs-2015-004386.
- 9  
10 17 Lawton R, Taylor N, Clay-Williams R, *et al*. Positive deviance: a different  
11 approach to achieving patient safety. *BMJ Qual Saf*. 2014;23:880–3.
- 12  
13 18 Bradley EH, Curry LA, Ramanadhan S, *et al*. Research in action: using positive  
14 deviance to improve quality of health care. *Implement Sci*. 2009;4:25.
- 15  
16 19 Gabbay RA, Friedberg MW, Miller-Day M, *et al*. A Positive Deviance Approach to  
17 Understanding Key Features to Improving Diabetes Care in the Medical Home.  
18 *Ann Fam Med*. 2013;11:S99–107.
- 19  
20 20 Baxter R, Taylor N, Kellar I, *et al*. Learning from positively deviant wards to  
21 improve patient safety: an observational study protocol. *BMJ Open*.  
22 2015;5:e009650.
- 23  
24 21 Rose AJ, Mccullough MB. A Practical Guide to Using the Positive Deviance  
25 Method in Health Services Research. *Health Serv Res*. 2016;2010:1–16.
- 26  
27 22 American Hospital Association. *AHA Hospital Statistics 2016*. Chicago: Health  
28 Forum. 2016.
- 29  
30 23 Lilford R, Pronovost P. Using hospital mortality rates to judge hospital  
31 performance: a bad idea that just won't go away. *BMJ*. 2010;340:c2016.
- 32  
33 24 Girling AJ, Hofer TP, Wu J, *et al*. Case-mix adjusted hospital mortality is a poor  
34 proxy for preventable mortality: a modelling study. *BMJ Qual Saf*. 2012;21:1052–6.
- 35  
36 25 Pitches DW, Mohammed M a, Lilford RJ. What is the empirical evidence that  
37 hospitals with higher-risk adjusted mortality rates provide poorer quality care? A  
38 systematic review of the literature. *BMC Health Serv Res*. 2007;7:91.
- 39  
40 26 Kozar R a, Holcomb JB, Xiong W, *et al*. Are all deaths recorded equally? The  
41 impact of hospice care on risk-adjusted mortality. *J Trauma Acute Care Surg*.  
42 2014;76:634–41.
- 43  
44 27 Rapoport J, Teres D, Zhao Y, *et al*. Length of stay data as a guide to hospital  
45 economic performance for ICU patients. *Med Care*. 2003;41:386–97.
- 46  
47 28 Combes A, Luyt CE, Trouillet JL, *et al*. Adverse effect on a referral intensive care  
48 unit's performance of accepting patients transferred from another intensive care  
49 unit. *Crit Care Med*. 2005;33:705–10.
- 50  
51 29 Kahn JM, Kramer AA, Rubenfeld GD. Transferring critically ill patients out of  
52 hospital improves the standardized mortality ratio: A simulation study. *Chest*.  
53 2007;131:68–75.
- 54  
55 30 Vasilevskis EE, Kuzniewics MW, Dean ML, *et al*. Relationship Between Discharge  
56 Practices and Intensive Evidence of a Discharge Bias. *Med Care*. 2009;47:803–  
57 12.
- 58  
59 31 Rosenberg AL, Hofer TP, Strachan C, *et al*. Accepting critically ill transfer patients:  
60 adverse effect on a referral center's outcome and benchmark measures. *Ann*  
*Intern Med*. 2003;138:882–90.
- 32 Cerner Corporation. *The APACHE IV Equations: Benchmarks for Mortality and*  
*Resource Use (white paper)*. Kansas City: Cerner; 2005.
- 33 Nicholl J, Jacques RM, Campbell MJ. Direct risk standardisation: a new method

- 1  
2  
3 for comparing casemix adjusted event rates using complex models. *BMC Med*  
4 *Res Methodol.* 2013;13:133.
- 5  
6 34 Gatz DF, Smith L. The standard error of a weighted mean concentration: I.  
7 Bootstrapping vs other methods. *Atmos Environ.* 1995;29:1185–93.
- 8  
9 35 Wood M. Bootstrapped Confidence Intervals as an Approach to Statistical  
10 Inference. *Organ Res Methods.* 2005;8:454–70.
- 11  
12 36 Efron B, Gong G. A Leisurely Look at the Bootstrap, the Jackknife, and Cross-  
13 Validation. *Am Stat.* 1983;37:36–48.
- 14  
15 37 Jones HE, Ohlssen DI, Spiegelhalter DJ. Use of the false discovery rate when  
16 comparing multiple health care providers. *J Clin Epidemiol.* 2008;61.
- 17  
18 38 Beebe J. *Rapid Qualitative Inquiry.* 2nd ed. London: Rowman & Littlefield; 2014.
- 19  
20 39 Damschroder LJ, Aron DC, Keith RE, *et al.* Fostering implementation of health  
21 services research findings into practice: a consolidated framework for advancing  
22 implementation science. *Implement Sci.* 2009;4:50.
- 23  
24 40 Nilsen P. Making sense of implementation theories, models and frameworks.  
25 *Implement Sci.* 2015;10:53.
- 26  
27 41 Bernard H. *Research Methods in Anthropology.* 5th ed. Walnut Creek: AltaMira;  
28 2011.
- 29  
30 42 Guest G, Bunce A, Johnson L. How Many Interviews Are Enough ? An  
31 Experiment with Data Saturation and Variability. *Field methods.* 2006;18:59–82.
- 32  
33 43 Bradley EH, Curry LA, Ramanadhan S, *et al.* Research in action : using positive  
34 deviance to improve quality of health care. 2009;11:1–11.
- 35  
36 44 Beebe J. *Rapid Assessment Process.* Walnut Creek: AltaMira; 2004.
- 37  
38 45 Emerson RM, Fretz RI, Shaw LL. *Writing Ethnographic Fieldnotes.* 2nd ed.  
39 Chicago: University of Chicago Press; 2001.
- 40  
41 46 Creswell JW. *Qualitative Inquiry and Research Design.* 3rd ed. Thousand Oaks:  
42 SAGE Publications; 2012.
- 43  
44 47 Bernard HR, Wutich A, Ryan GW. *Analyzing Qualitative Data: Systematic*  
45 *Approaches.* 2nd ed. Thousand Oaks: SAGE Publications; 2017.
- 46  
47 48 Dedoose. Version 7.0.23 [software]. SocioCultural Research Consultants. 2016  
48 [cited 2017 Jan 10]. Available from: <http://www.dedoose.com>.
- 49  
50 49 Yin RK. *Case Study Research.* 3rd ed. Thousand Oaks: SAGE Publications; 2003.
- 51  
52 50 de Lange DW. The Pitfalls of Benchmarking ICUs. *Crit Care Med.* 2015;43:473–4.
- 53  
54 51 Kramer AA, Higgins TL, Zimmerman JE. Comparing Observed and Predicted  
55 Mortality Among ICUs Using Different Prognostic Systems. *Crit Care Med.*  
56 2015;43:261–9.
- 57  
58  
59  
60

**SUPPLEMENTARY FILE 1:****Interview Guide****INTERVIEWER INSTRUCTIONS**

The questions below are not meant to be asked verbatim, nor asked necessarily in the order given here. Instead, they are meant to illustrate potential prompts that may be useful in eliciting participant responses within each domain. Your interview should be guided by the participant as much as the key domains below.

**INTRO QUESTIONS**

*// Intended to probe unit culture and experiences of the interviewee in an open-ended manner. //*

Tell us what it's like to work here.

Has working here changed over the time that you've been here? How?

What are some of the important working systems or practices that you have in place on the unit?

How are rounds done in your unit? Who participates? Are there particular practices that you think are unique to your unit in relation to rounds?

How do you know what the plan is for your patient(s)?

What are some of the biggest challenges to working here?

**FRAMING FOR DOMAIN-BASED SECTIONS**

We are particularly interested in how communication and work processes affect mortality rates and length of stay for patients. We've found that it is often useful to talk about these issues in the context of concrete examples, and so gear many questions toward patient progression and quality improvements on the unit. However, we invite you to think more broadly if other things come to mind related to these outcomes while we are asking these questions.

----

**DOMAIN 1 – UNIT PRACTICES AND COMMUNICATION**

*// Intended to probe: Unit-level practices that help move patients toward discharge. How front line staff communicates about patient plans. //*

I am going to move on to a few questions about communication around patient plans. In this section, we are focused on what we call "just right" patients. For us, these are patients "well-suited" for the ICU, i.e., not patients boarding in the ICU waiting for a lower level of care, or patients who are in the end of life/palliative category.

-----



1  
2  
3 Think about a 'just right' patient who you currently have on your list. How do you get information about this patient's  
4 plan? Do you get the same plan from everyone? When there is a discrepancy, why is that?  
5

6 How are you typically notified of a change in plans?  
7

8 How do you make sure to progress that patient toward discharge in a safe and timely manner? What specific things  
9 do you do?  
10

11 When complications arise, how is this handled? Does the plan change? How does the team communicate about this  
12 complication?  
13

14 When you talk about complications with your team, is it a warm and welcome environment? Punitive?  
15

16 (Normalize the fact that complications exist on the unit so staff can speak more openly.)  
17

18 Are patient plans managed 24/7?  
19

20 What role does the eICU play in the unit? What role does it play in patient progression?  
21  
22  
23

#### 24 **DOMAIN 1.2 – EFFECTIVE PATIENT PROGRESSION EXAMPLE**

25  
26 Think of a recent time where you felt like you effectively managed a 'just right' patient in a safe and timely manner.  
27 Tell me what happened and why you felt like this was effective.  
28

29 In your experience, how typical are these cases? What increases the likelihood of them happening?  
30  
31  
32  
33

#### 34 **DOMAIN 1.3 – INEFFECTIVE PATIENT PROGRESSION EXAMPLE**

35  
36 Think of a recent time where you felt like you did NOT effectively manage a 'just right' patient in a safe and timely  
37 manner. Tell me what happened and why you felt like it was ineffective.  
38

39 In your experience, how typical are those types cases? What increases the likelihood of these cases happening?  
40  
41  
42

#### 43 **DOMAIN 2 – QUALITY IMPROVEMENT**

44  
45 *// Intended to probe opinions on quality improvement efforts and outcomes. //*  
46

47 Ask about the concrete improvements and initiatives that have been previously mentioned by the unit director or  
48 other staff. Use people's local languages and examples as much as possible to make the questions relevant to the  
49 interviewed population.  
50

51 Are there specific initiatives that have been implemented to improve outcomes on the unit? If yes, give some  
52 examples.  
53

54 We spoke with \_\_\_\_\_, who mentioned \_\_\_\_\_ changes that have been put in place. Can you talk about  
55 how these are have been implemented?  
56  
57

1  
2  
3 Are these \_\_\_\_\_ efforts “worth it”?  
4

5 What are leadership factors that allow for continuous improvement of the unit?  
6

7 How often are there discussions with all staff about quality improvement? What are those discussions typically like?  
8 Do you ever give feedback?  
9

10 Important probe: Do you feel listened to?  
11

12 Does your management share data on your unit’s performance? Do you look at these data?  
13

14 Can you think about a time when a unit level quality improvement effort/program was rolled out and worked well?  
15 Describe to me what occurred.  
16

17 Probe: How was it rolled out? Was the staff involved in roll out?  
18

19 Can you think about a time when a unit level quality improvement effort was rolled out and did NOT work well?  
20 Describe to me what occurred.  
21  
22  
23

### 24 **DOMAIN 3 – MANAGEMENT/FRONTLINE STAFF DISCONNECTS AND CONNECTIONS**

25  
26 *// Intended to triangulate management perceptions with those of the frontline staff. //*  
27

28 *// Intended to probe how/if there are any unit level factors that help frontline staff progress their patients in a safe  
29 and timely manner. //*  
30

31 In general, a unit should function well in order for individual patients to progress and the unit to function. How does  
32 your leadership enable your unit to function maximally? What challenges affect communication or alignment between  
33 frontline staff and unit management?  
34

35  
36  
37 What are unit level factors that enable your frontline patient care processes regularly and efficiently?  
38  
39  
40

### 41 **CLOSING**

42  
43 *// Intended to allow for additional observations. //*  
44

45 What else have we not talked about yet that you feel affects mortality rates or length of stay for patients?  
46

47 Anything else that you would like for us to know about working on this unit, or your thoughts on the issues  
48 presented here?  
49

50 Who else should we speak with?  
51  
52  
53  
54  
55  
56  
57
